# Supplementary material
Source: Springer Nature journal article supplement (https://www.springermedizin.de/resource/supplementary/12916_2007_154_MOESM2_ESM.pdf/9599280)
Supplement: MOESM2 [file 9599280]

A

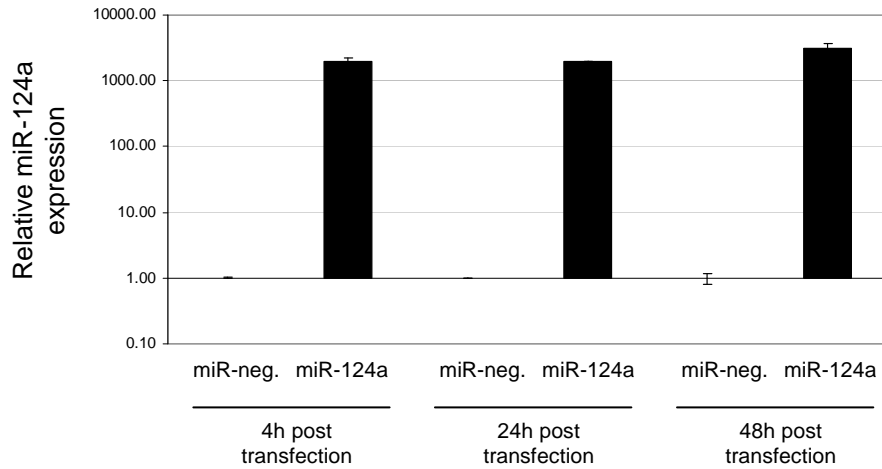

B

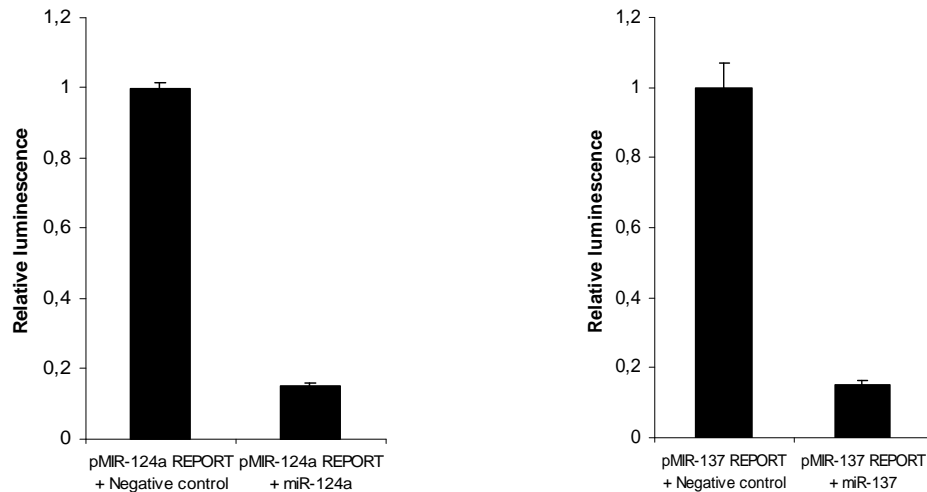

C

| Oligonucleotide | Sequence                                                           |
|-----------------|--------------------------------------------------------------------|
| miR-137 fw      | 5'- AGCTTAACTGTTATTGCTTAAGAATACGCGTAGGCGTCTATGCCGGCCTATGAGCTCCCTCA |
| miR-137 rv      | 5'- CTAGTGAGGGAGCTCATAGGCCGGCATAGACGCCTACGCGTATTCTTAAGCAATAACAGTTA |
| miR-124a fw     | 5'- AGCTTAACTGTTTAAGGCACGCGGTGAATGCCAGCGTCTATGCCGGCCTATGAGCTCCCTCA |
| miR-124a rv     | 5'- CTAGTGAGGGAGCTCATAGGCCGGCATAGACGCTGGCATTACC GCGTGCCTTAAACAGTTA |

**Additional file 2 (Supplementary figure 1) - Validation of miR-124 expression and function in GBM cells.** (A) miR-124 expression measured by TaqMan at 4h-48h following transfection of 100nM miR-124, or negative control microRNA (miR-neg), to U251 GBM cells (B) Expression of luciferase from the pMIR-REPORT vector (Ambion) containing a miR-124 binding site (pMIR-124 REPORT) is highly abrogated in the presence of miR-124 oligonucleotide mimics; Luciferase expression from pMIR-137 REPORT is highly abrogated in the presence of miR-137 oligonucleotide mimics. To generate pMIR-124a REPORT and pMIR-137 REPORT vectors, direct match miRNA target sites for miR-124a and miR-137 were generated by annealing complementary oligos (C), and then cloned into the HindIII and SpeI restriction sites of the pMIR-REPORT vector. A total of 200ng reporter vector and 50nM miR-124a, miR-137 or cel-miR-67 mimics were co-transfected into HEK 293T cells using siPORT NeoFX transfection Agent (Ambion). Luciferase expression was measured 48 hours post-transfection using the Xenogen Bioimaging luminescence system (IVIS 100).
